# Supplementary material
Source: PubMed Central journal article supplement (PMC7116459)
Supplement: EMS104387-supplement-Appendix.pdf [file EMS104387-supplement-Appendix.pdf]

**9. If you have given ventilations to a newborn requiring resuscitation for one minute, what step should be taken next?**

- a. The helper needs to establish IV access and push bicarbonate for the Circulation.
- b. Give oxygen by facemask and re-check the pulse within 30 seconds
- c. Listen for the pulse and if less than 60 begin chest compression at a rate of 3:1 breath
- d. Chest compressions are to be started at a rate of 3:1 for all babies who are not breathing
- e. Give ventilations at a rate of 80 breaths per minute so as to achieve faster ventilations

**10. The newborn baby warm chain includes:**

- a. Provision of a clean and warm surface
- b. Immediate bathing of the baby to make the baby clean
- c. Immediate drying of the newborn baby
- d. Wrapping the baby and giving it to the mother quickly after birth
- e. Putting the baby to the mother's breast

**11. Regarding heat loss by the newborn, the following statements are true, except?**

- a. Turning on the radiant warmer protects the baby from heat loss by radiation
- b. Drying the baby prevents heat loss by evaporation
- c. Pre-warming the towels prevent heat loss by conduction
- d. Covering the baby prevents heat loss by convection
- e. Liquid paraffin massage prevents heat loss by evaporation

**12. Which statement is true? When resuscitating newborn infants:**

- a. Oxygen is never needed
- b. Oxygen should be attached to the Bag-Valve-Mask device and used as a routine
- c. Oxygen is known to be completely safe
- d. Oxygen is not needed routinely but should be available if required
- e. Aim at Oxygen saturations above 90% within the first minute after birth

**13. Which statement is true? When performing a newborn resuscitation:**

- a. Give 3 breaths for every one compression in the newborn
- b. Give 15 breaths to every 2 compressions in the infant
- c. Give 2 breaths to every 15 compressions in the newborn
- d. Compressions are required in newborns with a heart rate of <60 beats per minute
- e. Aim at giving 60 breaths per minute within the first minute of resuscitation

**14. Regarding the newborn baby. Select the most suitable first action. You walk into the delivery room as a baby is being delivered. The birth assistant clamps and cuts the cord. She passes you the baby. As you carry the wet baby to a flat surface you notice it hasn't taken a breath and that there is no meconium around the face.**

- a. Dry and stimulate the baby
- b. Give inflation breaths
- c. Pass the baby for skin-to-skin
- d. Place the head in the neutral position
- e. Start chest compressions

**15. What are the initial steps of resuscitating a newborn:**

- a. Dry, assess colour, tone, cry, cover and position airway
- b. Position airway, give breaths with Chest compressions (1:3), IV Adrenaline
- c. Suction airway, position airway, assess breathing and activity, give 5 breaths
- d. Dry and cover, insert Guedel airway, clean airway, give breaths with chest compressions (1:3)
- e. Call for Help, Start ventilation 30 breaths/min

## Appendix II: Questionnaire for audit criteria 2

### Audit of structures

| ITEM                                                      | 1 | 2 | 3 |
|-----------------------------------------------------------|---|---|---|
| Warming device for room or resuscitaire                   |   |   |   |
| Two warm towels                                           |   |   |   |
| Hands washing facilities or hand sanitizer                |   |   |   |
| Cord clamps available                                     |   |   |   |
| BVM available for delivery and clean                      |   |   |   |
| Suction device available for delivery and clean           |   |   |   |
| Suction catheters available and clean                     |   |   |   |
| Resuscitation starts within one minute of birth if needed |   |   |   |
| TEO available for eye prophylaxis                         |   |   |   |
| Chlorhexidine available for cord care                     |   |   |   |
| Baby placed skin to skin with mother                      |   |   |   |

1 = Not available

2 = partially available/available and not ready for use

3 = available and ready for use

## Appendix III: Questionnaire for audit criteria 4

### MARAGUA DISTRICT HOSPITAL

1. **Place of delivery:**  
Maragua DH [ ]                      Referral [ ]                      Empty [ ]
  
2. **Mode of delivery:**  
SVD [ ]                      CS [ ]                      Empty [ ]
  
3. **Time of delivery:**  
Day 7am – 7pm [ ]                      Night 7pm – 7am [ ]                      Empty [ ]
  
4. **Gender:**  
Male [ ]                      Female [ ]                      Empty [ ]
  
5. **Birth weight:**  
<1500g [ ]                      1500g – 2500g [ ]                      >2500g [ ]                      Empty [ ]
  
6. **APGAR score:**  
1 min [ ]                      5 min [ ]                      10min [ ]                      Empty [ ]

## Appendix IV: Questionnaire for audit criteria 5

### MARAGUA DISTRICT HOSPITAL

1. **Place of delivery:**  
Maragua DH [ ]                      Referral [ ]                      Empty [ ]
2. **Mode of delivery:**  
SVD [ ]                      CS [ ]                      Empty [ ]
3. **Time of delivery:**  
Day 7am – 7pm [ ]                      Night 7pm – 7am [ ]                      Empty [ ]
4. **Gender:**  
Male [ ]                      Female [ ]                      Empty [ ]
5. **Birth weight:**  
<1500g [ ]                      1500g – 2500g [ ]                      >2500g [ ]                      Empty [ ]
6. **APGAR score:**  
1 min [ ]                      5 min [ ]                      10 min [ ]                      Empty [ ]
7. **Resuscitation done:**  
Yes [ ]                      No [ ]                      Empty [ ]
8. **If resuscitation done, tick all that apply:**  
Stimulation [ ]                      Use of suction device [ ]  
  
Use of bag valve mask device [ ]                      Oxygen [ ]  
  
Chest compressions [ ]                      Empty [ ]
9. **Outcome of delivery and resuscitation efforts:**  
Alive [ ]                      Dead [ ]                      Unknown [ ]

**Appendix V: Educational material for basic newborn resuscitation skills for healthcare providers**

Lecture on newborn resuscitation (resources from [www.idoc-Africa.org](http://www.idoc-Africa.org))
